# Supplementary material for: Research on Decision-Making Behavior of Discretionary Lane-Changing Based on Cumulative Prospect Theory
Source: Hindawi journal article supplement (doi:10.1155/2020/1291342), 2020-01-09
Supplement: f1 [file 1291342.f1.xlsx]

## Sheet: data set 1
ID	VM (m/s)	Vlo (m/s)	VLd (m/s)	VFd (m/s)	Xlo (m)	Xldm (m)	Xmfd (m)	lane-changing	duration (s)
0	9.34	7.39	10.06	9.83	9.17	23.44	24.67	1	5.42
1	12.09	11.97	13.82	15.2	15.45	28.64	15.94	1	5.24
2	11.64	10.45	14.02	14.88	22.28	31.84	16.13	1	5.95
3	10.96	11.33	10.85	11.26	13.45	35.11	13.45	1	5.72
4	12.33	11.03	12.54	12.86	14.91	39.67	11.25	1	5.37
5	10.66	10.86	11.25	11.4	19.17	29.07	11.2	1	5.31
6	9.21	7.83	11.67	11.19	9.01	49.47	27.4	1	5.31
7	12.45	12.64	14.37	14.97	15.53	41.75	30.7	1	4.3
8	11.71	10.52	13.26	15.18	12.91	25.06	14.29	1	5.64
9	9.45	8.49	10.08	11.06	11.95	40.05	30.71	1	5.33
10	12.43	10.64	13.8	15.74	13.69	39.49	29.39	1	4.79
11	9.92	10.78	12.07	11.78	17.05	49.96	15.44	1	4.82
12	12.27	13.02	14.29	14.11	15.95	41.09	21.42	1	5.7
13	10.59	10.25	11.68	12.56	15.54	55.47	25.73	1	5.14
14	9.9	8.42	10.93	11.23	9.62	27.52	17.82	1	5.18
15	8.61	6.8	8.27	7.96	13.64	56.09	18.18	1	5.73
16	10.82	11.37	10.93	12.69	17.98	27.58	17.48	1	6.259
17	12.05	10.24	13.24	15.13	19.73	50.26	18.02	1	6.269
18	12.18	10.72	12.92	13.63	9.48	29.47	18.48	1	6.49
19	9.73	8.1	10.96	12.25	16.11	51.75	30.86	1	6.35
20	11.68	11.39	13.77	14.62	9.25	35.01	30.72	1	6.15
21	12.32	12.39	14.78	15.51	11.41	52.19	23.88	1	5.93
22	11.1	10.14	11.92	13.21	18.87	33.67	16.88	1	3.94
23	9.97	8.02	11.55	11.5	21.85	49.22	27.11	1	4.75
24	9.87	10.64	10.54	12.51	16.79	59.24	9.37	1	5.99
25	8.63	7.1	9.51	11.29	19.72	60.99	14.53	1	4.91
26	9.08	8.5	9.14	9.39	12.59	24.73	24.99	1	6.19
27	9.26	8.08	11.68	12.93	21.52	43.04	21.22	1	4.65
28	8.94	9.1	9.27	9.92	22.25	39.97	27.1	1	6.18
29	10.19	8.99	11	12.67	9.91	24.34	18.17	1	6.31
30	11.23	11.39	12.64	13.46	21.03	40.34	29.68	1	5.55
31	12.21	12.77	13.69	15.46	13.31	49.26	16.53	1	6.384
32	11.45	12.13	12.47	13.48	21.95	50.37	16.01	1	7.06
33	12.34	11.28	14.39	14.71	14.31	29.1	12.22	1	5.11
34	10.61	9.02	11.13	12.34	13.23	54.9	18.91	1	5.62
35	11.75	12.44	12.77	13.81	19.7	50.36	30.35	1	5.02
36	11.25	11.08	12.62	12.9	13.42	50.3	15.79	1	5.05
37	11.53	11.55	13.96	13.51	19.58	57.46	13.32	1	5.48
38	9.5	8.13	9.41	8.93	18.92	39.15	24.27	1	5.34
39	12.21	12.36	13.6	14.2	12.09	43.07	13.23	1	3.87
40	9.46	8.51	9.31	9.85	16.01	51.31	25.52	1	4.08
41	9.58	8.31	11.36	12.82	10.88	36.48	11.49	1	6.33
42	10.5	9.73	12.18	12.43	13.22	25.09	12.39	1	5.25
43	10.5	11.13	10.87	10.41	13.95	34.91	11.99	1	5.59
44	10.76	10.14	12.19	12.19	14.3	46.74	23.97	1	4.96
45	11.59	11	13.65	14.25	17.63	42.43	25.75	1	3.81
46	10.38	10.9	12.46	14.41	13.17	43.17	30.06	1	4.27
47	9.78	8.14	10.16	9.67	19.6	29.5	30.47	1	4.72
48	8.77	7.78	8.65	8.81	10.46	30.87	9.58	1	5.11
49	12.11	12.21	14.32	14.33	18.79	30.24	16.66	1	5.71
50	11.98	12.29	12.78	13.36	10.03	29.99	20.34	1	5.28
51	9.1	9.04	9.29	10.72	13.71	45.47	30.64	1	5.57
52	11.71	10.24	13.8	15.28	9.99	44.98	20.3	1	4.88
53	9.68	9.17	10.62	11.94	21.21	60.11	16	1	4.68
54	11.7	11.87	11.83	11.71	13.94	22.62	17.61	1	5.5
55	10.37	8.67	10.96	12.11	17.11	40.04	32.28	1	3.99
56	10.66	10.33	12.8	13.47	17.29	59.82	11.33	1	5.73
57	8.88	8.07	10.85	12.67	18.34	29.1	27.48	1	6.03
58	9.16	10.13	10.19	10.83	11.55	20.68	10.39	1	6.26
59	9.21	9.34	9.47	10.07	21.95	35.45	19.45	1	6.06
60	11.24	10.64	11.38	11.32	11.71	32.89	19.34	1	6.88
61	9.87	10.64	10.93	12.87	18.83	47.17	28.67	1	5.51
62	9.02	8.73	9.19	9.94	16.02	55.73	9.68	1	6.26
63	11.4	11.21	12.38	13.78	15.39	41.53	28.62	1	5.31
64	11.25	9.71	13	14.02	20.12	42.05	29.31	1	6.02
65	8.89	8.2	10.14	9.94	13.84	30.27	11.34	1	6.78
66	11.13	10.55	11.75	13.03	19.79	37.23	23.09	1	5.97
67	9.18	9.95	8.94	10.37	17.77	30.42	28.96	1	4.95
68	12.32	12.49	13.74	14.6	11.47	30.63	26.73	1	6.34
69	12.13	10.18	14.46	15.93	19.34	27.67	20.06	1	6.7
70	11.52	9.71	13.61	13.25	19.28	42.31	11.44	1	5.67
71	8.51	7.99	8.78	10.44	18.5	38.87	11.69	1	6.324
72	10.09	8.22	11.86	11.6	18.75	27.66	15.8	1	5.71
73	11.19	11.35	12.57	12.82	12.13	33.36	25.41	1	5.41
74	12.31	13.15	14.33	15.16	11.91	33.57	13.89	1	5.74
75	10.3	8.86	11.04	12.48	14.01	56.95	22.62	1	5.51
76	10.86	11.37	11.68	12.18	22.34	35.42	26.79	1	4.55
77	10.78	9.3	11.82	12.01	17.48	27.17	21.06	1	4.78
78	12.24	13.22	11.77	11.79	19.31	27.81	22.45	1	4.93
79	8.63	7.84	8.18	8.23	8.97	51.26	32.45	1	7.32
80	11.81	11.16	14.08	14.31	16.36	32.33	28.1	1	4.35
81	11.76	10.51	13.29	14.43	12.88	21.84	16.7	1	4.1
82	12.31	12.15	12.43	13.78	21.27	49.57	15.69	1	4.94
83	11.77	10.09	11.64	13.56	8.91	36.03	26.26	1	5.32
84	11.93	10.03	14.22	15.12	12.56	30.71	32.82	1	5.42
85	9.28	8.06	10.02	11.48	8.74	48.91	13.61	1	5.96
86	11.16	12.11	12.54	14.27	15.54	26.48	20.87	1	4.39
87	11.7	11.01	13.04	14.67	13.53	51.4	30.48	1	5.21
88	9.19	8.79	10.04	11.55	16.98	28.11	13.75	1	5.88
89	9.79	8.55	12.2	13.79	11.23	45.44	19.3	1	4.47
90	11.47	10.78	13.47	13.14	12.31	35	10.34	1	5.61
91	9.98	9.93	12.39	14.19	14.71	47.59	13.65	1	7.49
92	11.97	10.46	13.9	14.88	9.1	40.36	23.48	1	5.99
93	12.31	11.72	11.99	12.24	20.82	31.74	18.22	1	6.11
94	9.35	9.05	10.77	12.37	10.94	26.35	28.98	1	6.23
95	11.22	10.68	11.73	11.72	15.65	35.23	13.57	1	5.35
96	9.91	8.97	12.32	12.57	13.68	35.46	9.72	1	5.56
97	9.97	9.02	11.12	11.6	12.34	42.88	22.7	1	6.48
98	11.56	11.95	11.18	13.17	14.92	48.8	26.62	1	6.11
99	10.56	11.5	12.66	14.31	12.01	37.93	20.66	1	5.75
100	12.38	12.44	13.3	15.27	10.54	36.79	28.54	1	4.75
101	9.08	9.58	8.71	10.23	15.85	48.49	16.81	1	3.97
102	10.61	10.74	12.58	12.54	20.28	38.49	26.63	1	5.97
103	8.61	6.9	10.66	10.3	14.85	48.7	11.17	1	4.63
104	11.23	12.02	13.64	13.95	14.8	52.48	21.53	1	5.63
105	12.46	13.06	11.99	12.69	16.6	54.84	29.34	1	6.61
106	9.19	8.81	11.49	11.76	19.14	41.36	26.44	1	4.2
107	9.53	8.65	9.34	10.05	13.19	41.78	16.35	1	5.45
108	10.17	10.6	10.48	11.78	21.69	63.13	18.68	1	5.27
109	10.82	11.56	11.11	12.86	15.87	33.03	11.03	1	5.64
110	9.18	7.19	10.13	9.94	9.23	23.48	26.23	1	5.59
111	12.07	11.67	12.41	12.55	13.69	54.45	21.96	1	4.48
112	10.19	8.63	10.96	11.99	12.2	45.29	25.1	1	6.08
113	11.2	11.55	12.96	13.45	18.63	50.3	23.63	1	5.64
114	9.33	8.12	9.13	10.62	12.93	33.91	27.11	1	4.29
115	11.78	12.1	12.52	14.34	17.9	39.65	11.17	1	5.53
116	9.92	8.99	10.75	11.89	13.78	31.9	21.71	1	5.02
117	9.97	9.1	9.83	10.75	20.58	29.8	24.48	1	4.18
118	11.95	12.58	12.9	13.06	11.35	46.11	17.02	1	3.91
119	8.75	6.99	11.23	11.01	18.35	27.87	11.2	1	4.65
120	9.96	7.99	12.05	12.58	12.34	37.93	30.14	1	5.4
121	11.68	10.12	12.18	14.06	19.18	59.81	16.15	1	4.94
122	11.67	10.93	13.06	13.12	12.84	33.71	30.88	1	5.07
123	10.01	10.74	10.34	10.09	22.17	37.55	27.4	1	5.76
124	11.33	10.21	11.6	12.26	12.74	46.99	27.38	1	5.71
125	11.86	10.01	13.46	12.98	17.07	28.87	28.01	1	4.88
126	10.18	11.05	12.02	13.72	19.22	47.74	24.34	1	5.37
127	10.04	10.49	12.07	11.62	14.49	27.55	10.18	1	6.04
128	10.28	10.78	11.72	12.09	17.45	55.98	20.88	1	5.58
129	8.57	7.68	10.52	11.08	20.16	40.18	13	1	5.11
130	11.95	11.48	11.49	11.17	20.23	49.07	13.76	1	6.13
131	12.11	10.65	11.75	13.29	10.01	27.49	25.86	1	5.55
132	10.11	9.54	10.04	9.92	11.79	24.48	11.79	1	5.08
133	10.15	10.8	9.95	9.57	17.55	54.6	21.54	1	6.65
134	8.94	8.52	8.94	10.15	15.11	37.3	11.35	1	6.34
135	12.38	12.07	13.79	15.31	17.85	46.45	20.25	1	6.23
136	10.1	8.43	11.96	11.75	17.53	27.27	19.22	1	5.73
137	10.97	9.81	11.57	11.93	8.74	30.79	12.96	1	4.04
138	12.41	11.62	14.24	16.21	14.71	30.87	19.99	1	5.98
139	10.88	11.8	11.16	12.13	18.68	51.27	14.8	1	5.56
140	10.02	9.71	10.08	9.6	19.05	61.34	16.85	1	5.39
141	8.83	8.96	9.93	9.97	19.92	39.33	28.73	1	5.86
142	9.78	9.51	9.36	9.41	17.63	47.57	23.44	1	5.88
143	8.53	8.95	8.41	9.16	17.97	31.27	19.3	1	5.7
144	8.65	8.52	8.93	8.81	19.7	51.64	23.1	1	4.37
145	9.86	10.81	9.97	9.85	11.6	48.2	24.53	1	4.62
146	9.49	10.09	11.58	11.52	22.88	62.22	16.18	1	5.09
147	12.18	10.92	12.42	13.76	19.52	54.36	18.49	1	5.52
148	11.44	9.82	11.85	12.28	16.94	33.57	13.02	1	5.76
149	11.79	12.01	13.85	14.39	19.06	46.91	28.35	1	5.51
150	10.89	8.92	10.92	10.74	21.38	63.93	29.38	1	6.28
151	9.38	8.89	11.09	12.94	20.96	42.65	15.57	1	5.3
152	11.52	11.87	12.8	14.42	18.55	29.08	19.97	1	5.91
153	10.65	10.21	11.34	11.56	8.93	39.2	17.57	1	6.01
154	9.08	9.99	8.59	9.05	17.97	32.55	10.35	1	5.66
155	9.49	9.94	10.6	11.99	18.34	48.48	10.34	1	4.79
156	12.23	10.45	11.99	12.31	22.33	57.3	16.32	1	5.44
157	11.82	10.84	11.98	13.53	13.16	30.55	31.82	1	5.7
158	10.58	8.87	12.52	13.35	21.9	43.04	30.13	1	5.35
159	11.24	11.89	11.34	11.28	14.1	40.39	20.36	1	5.83
160	10.31	8.32	10.22	10.26	17.6	57.83	8.36	1	4.8
161	9.58	8.13	9.86	10.89	13.88	39.91	29.58	1	5.75
162	9.62	8.75	9.62	10.3	10.68	21.95	14.69	1	5.84
163	10.41	9.59	12.44	13.35	16.59	39.59	28.36	1	6.05
164	11.14	10.21	11.65	11.2	8.17	43.83	24.54	1	4.31
165	11.85	9.99	12.9	14.83	14.75	56.17	23.19	1	4.84
166	12.35	10.67	12.04	12.16	16.09	55.72	16.15	1	6.06
167	9.9	10.57	11.75	12.3	11.89	27.99	10.02	1	6.57
168	10.44	8.58	10.5	11.51	14.12	45.41	21.14	1	4.25
169	10.84	11.71	10.89	11.47	20.77	33.66	13.98	1	6.52
170	11.05	9.07	11.53	11.78	18.04	36.44	8.5	1	4.95
171	9.98	10.28	12.06	12.82	20.49	36.39	29.03	1	5.38
172	12.43	12.62	13.14	12.7	13.11	41.19	28.37	1	5.67
173	10.88	10.05	13.19	12.72	13.89	51.54	23.27	1	5.26
174	9.61	10.02	10.83	12.06	25.29	22.59	9.51	0	-
175	9.88	10.02	10.34	11.99	17.31	25.72	17.68	0	-
176	10.3	10.68	11.99	12.3	20.15	14.67	6.4	0	-
177	9.6	9.96	11.57	12.27	31.72	13.44	15.41	0	-
178	13.17	12.3	13.61	15.17	29.56	34.7	10.82	0	-
179	13.09	13.79	13.26	14.15	22.47	21.07	9.96	0	-
180	11.75	13.04	12.4	13.71	21.02	26.34	15.53	0	-
181	10.41	12.37	12.12	13.86	21.69	35.93	13.05	0	-
182	8.53	7.65	10.98	11.31	23.76	17.3	12.79	0	-
183	10.93	12.27	12.17	13.22	15.25	21.41	8.24	0	-
184	10.78	12.01	12.76	13.66	16.83	35.14	9.13	0	-
185	10.61	9.62	12.23	13.32	25.52	37.36	15.93	0	-
186	8.9	9.91	8.72	10.42	19.48	25	13.53	0	-
187	10.51	11.53	11.37	12.98	27.42	35.97	11.49	0	-
188	9.81	11.58	12.25	11.87	23.45	16.15	16.47	0	-
189	11.51	12.19	12.58	12.15	13.14	33.47	8.12	0	-
190	9.38	8.39	10.39	11.18	29.68	25.15	17.12	0	-
191	12.32	13.3	12.78	12.65	10.75	32.75	6.42	0	-
192	10.89	12.81	10.77	11.36	21.23	27	15.37	0	-
193	13.17	15.04	14.87	14.94	18.45	31.27	14.76	0	-
194	12.71	14.01	12.84	12.39	15.64	36.9	11.24	0	-
195	11.02	12.14	12.75	14.51	24.19	16.54	11.49	0	-
196	9.06	9.9	8.76	10.36	18.8	33.09	17.68	0	-
197	10.39	9.61	10.73	12.34	13.06	30.07	11.48	0	-
198	9.29	9.68	8.98	10.21	20.21	19.14	11.91	0	-
199	10.01	9.16	11.32	11.86	23.66	30.04	6.77	0	-
200	8.68	9.24	8.8	10.19	17.3	23.32	7.91	0	-
201	12.69	12.01	13.02	13.85	23.06	14.26	18.56	0	-
202	11.19	11.23	13.35	12.89	16.03	27.31	9.9	0	-
203	10.42	11.6	11.03	11.08	18.99	28.68	7.48	0	-
204	12.29	11.65	13.01	13.17	28.62	14.9	6.24	0	-
205	9.74	10.68	11.62	12.01	17.21	35.73	15.98	0	-
206	9.58	9.09	10.86	10.59	18.56	22.23	12.06	0	-
207	13.11	14.2	12.99	13.06	15.54	14.39	15.88	0	-
208	9.54	11.32	11.61	13.18	20.62	35.85	7.92	0	-
209	10.79	10.33	10.79	10.5	29.86	37.72	12.08	0	-
210	8.76	9.57	8.33	8.09	10.14	20.75	13.13	0	-
211	11.32	12.66	12.92	14.01	17.35	29.35	11.04	0	-
212	10.69	11.72	13.18	14.07	14.86	32.8	19.89	0	-
213	8.69	7.85	8.22	9.47	25.4	34.86	18.67	0	-
214	11.98	11.31	12.04	12.02	27.49	37.37	18.76	0	-
215	11.97	11.89	11.84	12.6	21.73	26.16	18.79	0	-
216	13.2	13.87	14.39	15.21	15.54	23.61	12.54	0	-
217	13.12	14.13	13.14	12.81	20.53	22.3	15.77	0	-
218	10.09	10	10.35	11.6	19.89	25.12	6.71	0	-
219	12.72	11.86	14.86	15.12	24.62	33.9	16.8	0	-
220	12	11.62	14.11	14.84	30.55	14.16	19.87	0	-
221	9.13	10.21	8.68	9.56	22.45	34.39	10.68	0	-
222	9.53	9	10.86	12.74	15.85	24.38	9.92	0	-
223	10.85	10.75	11.57	11.59	29.67	30.3	15.1	0	-
224	9.68	10.5	10.27	10.61	25.36	27.74	18.29	0	-
225	9.73	9.91	9.9	11.35	12.25	33.54	5.52	0	-
226	11.08	11.42	11.39	11.13	24.71	30.8	9.36	0	-
227	11.85	11.75	12.96	13.53	27.15	32.52	12.59	0	-
228	11.86	13.35	13.99	14.07	23.12	18.43	15.56	0	-
229	8.55	8.37	9.13	9.27	28.19	21.83	11.36	0	-
230	9.24	8.58	10.86	12.05	29.29	33.41	17.93	0	-
231	11.43	13.38	11.05	10.6	24.29	33.64	19.07	0	-
232	11.69	11.31	12.48	13.78	10.98	21.55	13.87	0	-
233	9.61	10.03	10.29	11.3	20.52	24.6	8.79	0	-
234	10.19	11.13	11.16	12.26	12.76	33.68	8.03	0	-
235	11.17	10.35	10.82	11.27	16.13	35.38	8.7	0	-
236	8.91	10.23	10.89	11.23	15.25	31.82	13.4	0	-
237	9.25	11.23	9.72	11.16	17.74	22.61	14.76	0	-
238	11.95	13.63	14.08	14.26	19.86	27.27	7.93	0	-
239	10.99	12.32	10.95	10.9	15.39	30.33	17.67	0	-
240	11.85	13.31	11.58	11.46	22.22	29.41	8.34	0	-
241	10.89	10.27	10.46	11.26	22.48	24.31	17.38	0	-
242	12.93	12.45	14.22	15.32	17.52	37.14	5.77	0	-
243	10.84	11.72	12.24	12.37	20.75	13.14	9.25	0	-
244	13.22	15.02	14.91	16.29	30.65	14.88	10.14	0	-
245	8.75	8.88	10.93	11.77	23.75	32.01	13.1	0	-
246	10.15	11.21	9.68	11.16	13.25	26.76	15.75	0	-
247	10.35	12.15	12.31	12.09	25.78	34.92	7.75	0	-
248	11.61	12.82	13.77	14.61	21.81	22.45	14.79	0	-
249	13	14.36	13.7	13.52	24.37	29.86	17.43	0	-
250	9.75	11.06	11.74	12.85	25.66	32.2	19.8	0	-
251	12.75	12.75	14.04	13.9	29.88	15.87	12.15	0	-
252	9.87	10.18	9.86	10.7	19.44	28.96	16.6	0	-
253	9.7	9.1	11.88	12.46	15.84	30.08	6.96	0	-
254	8.51	8.24	9.24	8.86	26.09	20.29	18.99	0	-
255	10.41	11.76	11.15	10.66	16.87	28.16	16.72	0	-
256	8.97	10.17	8.66	8.72	17.99	23.02	7.14	0	-
257	9.61	10.45	9.53	9.16	17.67	21.95	18.92	0	-
258	13.06	13.06	12.88	12.9	13.3	14.04	19.44	0	-
259	9.49	9.1	10.61	11.15	22.21	33.38	8.46	0	-
260	11.55	12.59	13.5	13.39	15.57	17.62	8.23	0	-
261	9.76	8.86	12.17	13.59	25.92	15.25	13.52	0	-
262	12.02	12.33	12.93	14.93	23.67	14.61	7.97	0	-
263	8.96	9.42	10.6	11.45	26.79	35.99	7.11	0	-
264	10	11.09	10.76	12.21	27.56	31.76	12.38	0	-
265	10.15	11.42	11.33	11.67	23.43	21.07	10.68	0	-
266	9.89	9.62	10.15	10.53	12.14	26.42	13.81	0	-
267	13.05	14.65	13.97	14.28	29.51	35.9	6.63	0	-
268	8.88	10.72	9.88	10.01	17.27	14.17	8.72	0	-
269	9.72	9.37	11.72	12.72	19.45	25.93	8.62	0	-
270	11.91	11.47	14.24	16.14	14.64	28.65	5.41	0	-
271	11.31	11.26	12.48	14.28	23.07	15.66	15.24	0	-
272	10.13	9.81	11.32	11.22	22.15	36.17	9.46	0	-
273	12.24	13.79	13.76	15.62	25.42	31.09	15.31	0	-
274	10.62	10.43	11.66	12.35	31.8	22.82	13.7	0	-
275	8.52	7.56	10.65	12.29	23.09	33.91	14.74	0	-
276	11	10.37	11.58	12.44	24.43	29.95	14.03	0	-
277	12.4	13.46	13.45	14.32	13.68	36.64	13.76	0	-
278	9.5	11.35	11.49	11.65	20.73	36.65	12.33	0	-
279	12.81	12.83	14.35	14.89	16.36	22.48	12.32	0	-
280	9.86	8.98	12	13.12	21.23	17.3	6.39	0	-
281	9.33	8.75	11.3	13.27	22.46	17.84	9.21	0	-
282	10.46	11.23	10.1	9.92	19.69	37.25	9.58	0	-
283	8.55	8.95	9.99	10.37	21.76	16.32	13.75	0	-
284	9.68	10.8	11.39	13.27	30.44	18	7.68	0	-
285	11.77	12.92	12.32	12.63	25.83	24.94	15.57	0	-
286	12.72	14.55	12.68	13.91	12.79	19.4	19.73	0	-
287	10.56	12.55	11.01	10.59	30.27	16.29	19.37	0	-
288	12.92	14.24	15.2	15.28	31.94	26.45	12.18	0	-
289	8.62	9.74	10.47	10.79	22.46	20.37	18.39	0	-
290	11.26	10.67	12.15	13.17	20.02	25.82	11.58	0	-
291	11.71	12.21	11.25	10.84	12.62	35.76	15.53	0	-
292	10.14	10.9	12.36	11.98	18.21	17.56	16.15	0	-
293	12.04	13.51	14.04	15.52	16.49	22.99	13.16	0	-
294	11.3	10.66	13.44	15.01	17.58	30.34	6.14	0	-
295	12.09	11.74	11.73	13.04	14.16	32.74	11.06	0	-
296	8.96	8.02	10.41	12.19	20.78	27.27	18.59	0	-
297	9.83	9.14	9.87	10.92	22.93	22.18	13.61	0	-
298	11.43	13.16	12.4	12.42	19.35	15.34	18.32	0	-
299	11.68	13.37	11.55	13.03	17.51	26.53	11.17	0	-
300	10.19	9.52	10.08	11.56	23.33	22.37	13.86	0	-
301	12.14	12.34	13.64	13.42	26.72	17.2	9.27	0	-
302	12.56	12.52	13.16	14.86	18.74	36.98	5.36	0	-
303	8.7	9.19	9.13	9.01	30.78	19.38	19.18	0	-
304	12.29	13.72	12.69	13.81	19.41	15.75	8.23	0	-
305	13.48	14.86	15.11	14.76	12.32	34.59	12.93	0	-
306	12.56	14.34	13.29	14.74	22.48	17.76	15.59	0	-
307	11.32	12.84	13.09	14.29	18.75	26.02	15.96	0	-
308	9.98	11.59	10.46	11.86	22.01	25.75	17.92	0	-
309	8.61	9.27	9.56	9.66	29.02	21.09	8.17	0	-
310	10.59	12	12.71	13.4	32.45	19.84	16.38	0	-
311	13.25	14.93	14.07	15.78	23.3	34.17	9.09	0	-
312	10.79	9.87	12.39	14.16	25.86	31.26	7.44	0	-
313	9.61	9.06	11.39	12.45	26.65	25.74	12.14	0	-
314	10.4	11.61	12.34	13.55	17.36	27.27	19.18	0	-
315	13.22	12.59	15.5	16.5	28.73	16.56	17.78	0	-
316	12.51	13.72	14.89	16.85	24.17	21.5	8.15	0	-
317	8.68	9.43	8.84	9.79	23.81	26.51	14.93	0	-
318	11.45	10.7	13.1	14.86	18.23	34.72	7.86	0	-
319	9.11	9.18	11.46	12.11	30.56	25.03	15.71	0	-
320	10.97	10.69	11.99	12.15	22.66	29.25	14.35	0	-
321	12.86	14.25	13.14	13.99	22.06	24.2	16.76	0	-
322	11.01	11.99	11.6	13.32	20.61	22.38	13.32	0	-
323	10.91	12.18	11.03	12.19	29.21	29.16	18.45	0	-
324	12.28	13.53	13.43	15.16	30.77	15.89	11.77	0	-
325	12.91	12.8	12.79	13.84	16.05	27.52	8.21	0	-
326	8.61	7.98	9.47	11.13	28.47	26.81	8.22	0	-
327	10.47	9.48	10.99	11.16	15.4	27.76	8.23	0	-
328	11.01	12.14	12.11	12.45	23.89	16.4	14.23	0	-
329	8.53	8.8	8.26	10	15.1	17.77	6.78	0	-
330	9.6	11.34	11.78	11.84	15.83	29.5	14.67	0	-
331	13.06	13.73	14.06	15.04	13.84	19.87	15.18	0	-
332	12.16	13.35	12.98	14.49	15.17	30.16	10.79	0	-
333	12.84	13.74	14.38	14.16	26.54	35.05	13.98	0	-
334	9.74	8.96	11.32	12.44	16.53	20.73	14.15	0	-
335	8.59	10.11	9.09	9.65	15.42	23.71	9.27	0	-
336	13.22	13.61	15.18	16.64	25.46	33.4	10.6	0	-
337	11.23	11.75	10.82	10.69	32.75	18.38	10.03	0	-
338	12.45	13.6	14.56	16.22	30.96	35.26	6.63	0	-
339	12.64	12.38	15.12	16.14	28.21	26.15	18.85	0	-
340	13.01	14.51	13.77	15.5	22.13	34.03	12.37	0	-
341	11.43	13.1	12.98	12.8	11.68	25.51	14.99	0	-
342	13.13	14.9	13.33	14.56	27.94	22.64	18.05	0	-
343	9.95	11.83	9.84	11.77	14.24	24.98	8.93	0	-
344	8.57	8.24	10	12	24.99	35.07	12.3	0	-
345	12.05	13.77	12.09	12.51	32.46	22.6	14.21	0	-
346	11.7	11.42	11.49	11.37	31.38	26.36	16.98	0	-
347	10.58	11.82	11.4	11.07	28.97	20.85	18.91	0	-
348	9.3	11.01	11.19	11.04	21.2	23.51	7.14	0	-
349	10.48	12.45	12.88	14.4	18.15	33.29	9.3	0	-
350	9.29	10.19	9.28	10.74	30.12	21.53	14.26	0	-
351	10.92	9.98	12.94	13.81	29.27	20.5	9.96	0	-
352	9.66	9.39	10.71	11.04	17.88	18.95	15.28	0	-
353	10.92	12.9	12.19	12.43	25.33	17.24	14.86	0	-
354	10.5	10.77	12.91	14.91	27.52	18.02	8.41	0	-
355	13.43	14.26	13.99	13.89	20.34	24.56	18.05	0	-
356	11.77	12.09	11.38	10.98	12.87	25.1	13.12	0	-
357	11.92	12.45	12.67	14.51	16.61	21.61	10.35	0	-
358	13.36	12.57	14.05	15.52	11.89	20.99	13.77	0	-
359	10.74	11.58	12.99	14.8	18.6	25.12	13.11	0	-
360	10.05	11.94	10.45	10.09	14.4	21.3	7.18	0	-
361	9.25	10.28	9.02	9.17	12.55	28.35	15.04	0	-
362	10.49	12.01	11.61	11.86	20.43	14.8	17.87	0	-
363	12.55	12.47	13.06	13.12	23.34	35.38	14.66	0	-
364	9.52	9.59	9.23	9.19	19.62	35.31	9.14	0	-
365	13.34	13.53	14.14	15.61	27.08	29.92	10.89	0	-
366	11.13	11.54	11.29	12.84	27.71	32.39	10.12	0	-
367	12.61	13.13	12.89	14.88	23.52	27.48	6.95	0	-
368	10.76	11.62	13.17	14.86	22.3	23.56	16.19	0	-
369	12.61	12.77	12.48	13.66	11.61	17.83	7.99	0	-
370	10.54	10.89	10.39	12.19	16.92	25.85	18.93	0	-
371	12.98	14.51	15.12	16.68	21.91	17.77	11.19	0	-
372	11.79	12.43	13.87	13.52	18.09	31.43	9.92	0	-
373	9.66	10.79	12.01	13.63	15.13	20.08	7.7	0	-
374	11.82	11.8	12.57	12.35	24.76	14.76	10.96	0	-
375	10.28	11.7	10.29	11.6	18.77	20.68	16.73	0	-
376	8.76	8.74	9.85	11.43	15.03	29.86	11.97	0	-
377	11.47	12.53	13.24	15.19	11.91	29.19	8.89	0	-
378	11.9	13.39	12.39	13.37	20.88	26.97	15.24	0	-
379	8.66	8.24	9.59	10.07	27.81	24.14	15.81	0	-
380	9.65	9.16	10.56	12.05	26.38	17.08	14.84	0	-
381	8.92	8.3	11.22	12.58	16.12	34.79	17.06	0	-
382	10.38	9.98	9.92	10.94	13.42	26.48	18.12	0	-
383	10.77	9.94	12.57	12.73	14.98	24.21	12.89	0	-
384	10.25	12.22	10.07	11.58	29.26	19.56	9.28	0	-
385	10.5	10.62	10.72	11.03	27.54	19.75	12.62	0	-
386	12.44	13.5	14.41	15.78	20.48	16.53	6.85	0	-
387	13.22	12.33	15.45	17.18	27.24	20.18	12.68	0	-
388	8.92	8.47	9.86	10.2	24.05	20.65	7.84	0	-
389	12.94	13.73	13.25	14.99	30.05	27.49	9.2	0	-
390	12.08	14.01	14.18	14.47	26.38	13.94	6.3	0	-
391	12.26	13.91	12.02	12.92	19.81	30.15	14.33	0	-
392	10.46	11.67	12.25	12.89	22.07	35.34	9.36	0	-
393	12.85	12.79	14.18	15.26	18.26	15.96	8.65	0	-
394	13.1	12.26	15.6	17.28	22.33	21.95	17.25	0	-
395	11.39	12.21	12.53	13.48	27.2	30.84	7.71	0	-
396	12.24	13.47	13.34	13.37	15.12	29.97	11.08	0	-
397	12.9	12.15	14.33	15.39	30.48	15.58	7.84	0	-
398	9.14	8.67	11.58	13.29	29.37	34.05	14.17	0	-
399	10.66	11.42	11.01	11.36	31.21	36.58	18.23	0	-
400	10.71	10.12	12.73	12.33	10.67	28.07	14.34	0	-
401	10.06	9.96	11.9	11.72	22.47	34.62	17.93	0	-
402	11.33	10.97	12.97	14.55	32.32	35.65	11.25	0	-
403	9.7	11.7	11.2	12.06	16.05	27.58	12.47	0	-
404	13.01	13.14	13.43	14.82	30.01	31.18	14.75	0	-
405	11.91	12.56	14.16	14.26	21.67	13.27	13.94	0	-
406	8.78	8.76	9.27	10.02	17.63	18.95	14.87	0	-
407	9.9	9.27	9.79	9.57	25.06	17.33	18.8	0	-
408	13.43	13.55	15.42	16.79	22.42	22.01	10.68	0	-
409	13.44	12.5	14.93	14.85	18.22	18.16	12.5	0	-
410	10.07	9.8	12.29	13.9	14.99	37.53	7.16	0	-
411	11.04	10.81	13.26	14.88	15.73	33.48	12.57	0	-
412	10	11.11	12.03	13.28	28.1	22.39	11.18	0	-
413	12.19	12.88	12.97	13.76	16.24	35.79	15.03	0	-
414	9.99	11.27	9.88	10.43	13.8	33.54	7.93	0	-
415	8.72	7.99	11.03	11.42	23.35	22.07	11.49	0	-
416	9.26	8.51	11.65	11.68	21.08	31.27	12.04	0	-
417	11.14	10.75	12.95	13.82	26.79	27.02	10.37	0	-
418	8.57	9.69	8.43	10.42	22.17	15.89	17.89	0	-
419	11.94	11.74	13.34	13.57	24.16	17.36	15.03	0	-
420	9.85	9.72	10.97	11.75	28.11	33.63	7.93	0	-
421	9.26	10.2	9.37	10.58	10.47	36.57	7.17	0	-
422	8.55	8.81	10.53	12.39	19.27	25.33	15.94	0	-
423	10.5	11.47	11.76	13.16	18.97	32.87	7.55	0	-
424	11.26	12.9	12.02	11.53	26.48	22.3	14.67	0	-
425	11.05	11.22	12.45	12.21	25.17	20.8	12.01	0	-
426	11.48	12.45	13.12	13.64	21.03	30.23	17.22	0	-
427	11.25	10.87	12.87	13.35	21.96	15.73	17.06	0	-
428	13	13.28	13.23	14.94	15.13	23.8	17.35	0	-

## Sheet: data set 2
ID	VM (m/s)	Vlo (m/s)	VLd (m/s)	VFd (m/s)	Xlo (m)	Xldm (m)	Xmfd (m)	lane-changing	duration (s)
0	8.7	9.15	9.51	11.15	11.08	51.62	15.07	1	3.95
1	11.42	11.44	10.85	10.46	31.43	69.89	6.13	1	4.16
2	9.72	8.78	9.43	10.61	23.39	34.34	17.67	1	4.48
3	10.41	10.1	11.57	10.71	29.81	52.49	20.95	1	4.82
4	10.44	10.51	11.7	8.86	25.28	43.47	9.32	1	4.89
5	9.7	9.71	10.46	10.3	30.97	51.57	19.42	1	6.15
6	10.12	10.52	12.1	10.69	29.69	63.75	19.49	1	5.64
7	11.73	9.66	12.36	11.23	22.64	46.33	17.54	1	5.61
8	10.17	9.52	11.74	8.53	17.41	66.33	20.96	1	6.95
9	10.78	8.99	11.64	10.23	22.67	41.33	20.08	1	6.87
10	11.44	9.69	12.45	11.79	18.48	42.57	11.47	1	5.56
11	9.28	8.52	11.45	8.29	25.2	49.39	14.5	1	6.58
12	10.21	9.87	10.6	10.09	14.8	31.7	5.36	1	6.21
13	10.72	9.39	10.63	10.15	12.73	32.28	4.82	1	5.8
14	9.48	10.4	11	10.79	16.84	35.15	18.36	1	6.81
15	10.16	11.8	10.06	10.6	22.82	65.4	19.09	1	5.72
16	11.73	9.85	10.39	9.5	23.54	41.19	11.73	1	6
17	10.75	10.01	10.48	9.28	19.99	68.47	10.21	1	6.07
18	10.97	11.79	11.82	8.29	16.71	44.15	25.69	1	5.84
19	10.01	10.76	10.88	9.07	14.87	56.31	20.35	1	5.88
20	10.18	9.82	11.72	9.15	21.88	51.63	10.42	1	5.05
21	11.79	10.88	10.29	10.57	26.82	53.98	26.04	1	6.21
22	12.6	11.64	11.85	10.33	18.89	39.01	21.14	1	6.44
23	11.37	8.94	10.78	10.57	24.96	53.01	17.38	1	4.72
24	10.94	10.6	10.18	11.89	19.43	33.81	11.16	1	5.89
25	10.5	8.87	11.85	9.77	24.57	62.02	26.2	1	6.91
26	10.13	11.43	11.04	9.97	20.86	49.53	14.86	1	5.9
27	10.28	10.53	11.94	11.55	16.52	39.91	17.32	1	6.36
28	9.2	9.44	10.97	8.55	16.28	28.29	8.28	1	5.26
29	11.05	10.92	10.31	10.1	22.11	42.61	15.27	1	5.52
30	10.57	9.38	11.84	10.26	18.25	34.12	25.74	1	5.72
31	11.79	10.16	11.29	10.18	27.67	56.22	23.49	1	7.65
32	11.34	10.54	11.68	10.1	18.86	70.62	21.86	1	5.54
33	8.99	8.91	8.31	9.32	18.21	33.46	12.41	1	4.63
34	10.08	11.14	11.78	11.45	19.99	37.91	18.73	1	6.01
35	10.09	10.45	11.39	11.27	17.01	33.37	26.18	1	5.23
36	10.62	10.88	11.04	10.74	15.48	35.83	8.75	1	5.67
37	9.36	9.53	11.56	8.47	28.55	68.64	19.51	1	5.39
38	11	10.72	12.42	9.15	13.71	60.58	6.05	1	4.42
39	10.56	9.45	11.65	9.27	18.89	69.52	10.11	1	6.14
40	11.32	9.28	11.97	10.76	20.52	59.42	24.19	1	6.62
41	9.84	9.12	11.34	10.35	14.17	16.39	17.29	1	4.94
42	10.12	10.22	11.2	11.47	16.59	40.82	25.54	1	5.17
43	10.3	10.58	8.18	9.68	21.17	58.42	9.41	1	4.4
44	11.85	11.32	11.33	10.63	25.82	43.33	22.17	1	5.33
45	10.86	11.42	9.97	11.77	19.92	66.37	18.35	1	5.18
46	8.4	8.51	9.55	8.09	23.76	39.12	20	1	4.5
47	9.17	9.6	9.11	10.38	22.55	59.32	18.42	1	5.65
48	10.63	11.63	11.94	8.87	11.31	68.93	11.94	1	5.28
49	10.99	9.57	13.4	10.64	26.66	70.55	8.96	1	4.28
50	10.1	8.22	9.11	10.37	16.75	29.9	10.85	1	6.11
51	10.51	11.07	10.47	10.22	26.59	55.58	18.54	1	5.69
52	10	11.47	11.35	10.43	23.11	70.02	17.38	1	4.89
53	10.85	10.78	11.41	11.22	20.6	61.55	13.87	1	4.34
54	11.49	10.97	11.92	9.46	17.94	38.34	15.51	1	4.56
55	9.76	9.12	10.98	11.93	12.97	25.77	11.03	1	4.73
56	10.14	9.99	8.9	9.11	18.08	29.81	14.1	1	5
57	11.2	11.07	12.74	11.5	26	60.35	25.79	1	4.38
58	9.99	8.19	11.87	10.45	18.61	65.53	19.51	1	5.99
59	11.21	9.29	8.25	11.82	11.23	21.64	23.57	1	5.94
60	8.31	8.54	10.4	8.01	14.6	55.61	22.28	1	5.31
61	11.78	10.05	11.47	11.16	21.86	58.62	25.41	1	6.66
62	9.71	9.99	11.13	10.88	21.88	63.18	20.98	1	3.93
63	10.11	9.44	11.25	11.64	32.48	52.74	24.09	1	6.59
64	10.79	10.77	12.04	10.45	24.99	63.05	24.03	1	4.94
65	10.23	9.8	11.26	10.33	14.74	50.03	21.11	1	6.08
66	8.85	9.15	9.61	9.28	16.49	29.91	10.1	1	5.03
67	9.34	10.15	11.49	8.4	30.15	63.8	16.76	1	4.77
68	8.06	9	8.71	9.42	9.47	32.85	22.86	1	5.96
69	11.92	9.73	11.19	10.64	24.51	54.25	10.71	1	6.1
70	9.04	10.92	9.94	11.11	24.23	63.31	19.47	1	5.78
71	10.68	9.62	11.65	8.22	16.52	62.55	6.56	1	4.75
72	10.93	8.52	11.4	9.68	28.7	50.27	9.29	1	5.52
73	10.47	9.6	11.85	9.65	18.71	54.26	19.87	1	4.83
74	9.74	9.01	11.05	9.56	21.72	48.84	24.07	1	6.07
75	9.45	9.9	11	10.82	19.18	60.78	19.31	1	5.26
76	9.55	8.17	8.47	9.94	23.31	35.96	20.93	1	4.22
77	9.54	8.32	10.37	9.76	28.74	59.65	27.4	1	4.75
78	11.58	10.51	9.15	8.84	23.17	63.9	17.53	1	5.04
79	9.66	11.41	11.07	9.85	28.53	72.58	16.97	1	6.07
80	10.68	8.69	9.43	9.05	19.88	67.87	16.04	1	6.46
81	9.72	9.6	8.92	10.12	12.91	53.84	20.36	1	5.41
82	10.29	10.02	11.04	11.57	12.04	17.69	4.69	1	6.04
83	10.3	11.78	10.67	10.25	15.37	39.48	27.17	1	5.73
84	9.52	10.32	11.8	10.12	23.5	46.09	26.41	1	5.01
85	8.53	9.11	9.82	9.03	12.77	49.81	23.01	1	3.93
86	11.18	10.94	11.99	9.29	24.24	64.16	26.27	1	5.44
87	10.62	10.46	13.57	10.8	13.9	39.8	15.91	1	4.5
88	11.12	11.04	12.87	10.43	31.69	59.63	23.47	1	4.24
89	11.44	10.91	10.46	10.24	18.94	39.26	24.46	1	5.9
90	9.54	8.3	8.16	10.24	17.48	51.12	19.38	1	6.27
91	9.06	9.4	9.36	10.6	17.25	45.99	20.49	1	5.15
92	9.11	9.91	11.45	11.71	17.37	58.86	21.7	1	6.16
93	8.11	10.47	10.75	8.08	13.29	31.68	20.64	1	6.28
94	10.24	11.05	11.51	11	15.15	29.07	9.09	1	5.75
95	9.04	9.92	10.51	11.87	14.73	31.14	17.22	1	5.68
96	11.48	11.05	11.85	11.79	26.75	46.52	21.93	1	5.14
97	10.82	9.11	8.48	8.29	15.19	26.44	20.48	1	6.09
98	11.8	10.81	11.41	10.38	30.19	65.02	8.8	1	4.49
99	9.13	9.02	11.05	9.52	14.67	59.03	22.44	1	4.83
100	8.91	8.24	10.89	8.84	25.8	52.83	27.26	1	4.56
101	10.99	9.85	10.37	9.99	19.2	43.99	22.77	1	6.78
102	11.99	8.78	8.63	8.69	17.07	28.92	16.09	1	6.2
103	11.61	10.09	10.14	10.98	19.16	35	12.04	1	5.1
104	10.25	10.17	11.75	8.04	17.38	31.51	13.88	1	4.38
105	10.51	10.73	10.59	9.78	27.75	59.97	17.8	1	6.56
106	10.44	11.75	11.26	11.89	14.22	61.47	18.5	1	6.96
107	9.82	11.71	10.14	8.4	18.01	42.26	13.69	1	4.47
108	9.35	11.24	9.08	11.5	10.71	23.69	15.22	1	4.62
109	8.68	10.81	11.4	8.41	17.47	65.25	9.61	1	5.24
110	9.86	11.24	10.42	8.68	15.17	64.73	8.51	1	5.46
111	10.2	8.34	10.94	11.07	20.41	42.94	15.29	1	5.55
112	11.53	11.4	13.72	14.61	10.43	20.21	13.43	1	5.66
113	11.4	9.59	11.34	12.56	18.5	33.88	9.82	1	3.66
114	9.59	7.96	10.91	11.22	20.31	62.29	21.73	1	4.65
115	9.59	9.05	11.17	12.64	18.51	44.89	25.41	1	5.72
116	8.84	7.11	9.99	10.13	13.04	25.2	28.67	1	5.56
117	9.87	7.98	10.39	10.32	13.83	48.42	31.16	1	6.24
118	9.17	7.46	9.46	10.78	14.67	24.53	20.53	1	4.55
119	9.3	8.11	11.58	13.13	10.74	46.32	14.02	1	6.6
120	11.94	12.87	11.72	11.27	19.34	54.77	24.82	1	6.97
121	12.49	13.31	14	14.49	11.24	42.21	24.09	1	5.28
122	10.84	11.38	11.66	11.73	17.81	43.5	28.42	1	5.66
123	9.76	8.56	11.3	12.5	10.79	45.97	14.34	1	5.89
124	10.95	9.18	10.78	12.19	13.94	30.03	25.62	1	5.3
125	12.09	12.43	12.55	12.09	17.25	55.84	17.17	1	5.1
126	12.14	11.63	13.49	13.74	15.86	55.73	29.81	1	4.83
127	10.8	10.58	12.81	12.84	14.84	29.95	10.42	1	6.99
128	9.47	9.93	9.9	10.09	18.46	49.58	12.16	1	6.16
129	12.5	12.92	12.57	14.14	14.26	42.83	16.42	1	6.49
130	12.5	11.57	12.15	13.96	21.5	39.52	11.03	1	6.15
131	9.18	8.87	10.3	11.54	19.41	53.95	27.12	1	6.08
132	8.81	8.9	10.17	10.08	13.92	43.62	18.06	1	4.32
133	12.02	10.51	11.86	13.1	10.39	23.04	11.15	1	5.49
134	10.4	9.2	11.89	11.93	17.03	27.27	29.6	1	6.12
135	10.1	8.62	11.97	12.58	11.82	39.27	13.28	1	5.72
136	9.84	9.33	9.53	10.19	19.85	28.58	27.61	1	5.29
137	11.82	11.05	12.74	13.99	12.24	49.93	27.22	1	6.37
138	9.02	8.7	9.06	10.7	19.32	37.96	28.15	1	6.41
139	9.37	8.18	11.67	12.08	21.15	58.11	13.94	1	3.8
140	10.52	10.23	10.21	10.54	16.16	42.1	19.54	1	4.55
141	9.25	9.06	11.26	11.77	12.83	44.05	25.56	1	6.4
142	9.28	9.79	9.68	10.05	18.04	46.15	27.65	1	5.08
143	9.81	8.02	11.8	12.81	19.4	47.16	23.57	1	5.57
144	9.7	9.45	10.49	11.79	14.14	54.93	12.8	1	4.75
145	9.21	7.36	8.94	10.72	15.98	44.6	25.43	1	6.14
146	11.04	10.26	12.31	14.1	14.93	49.73	20.27	1	7.03
147	12.02	11.19	12.28	13.54	20.89	45.35	10.49	1	5.42
148	9.23	9.41	10.96	11.07	13.83	21.96	14.12	1	5.4
149	12.04	10.49	13.1	13.6	14.78	54.24	17.75	1	5.35
150	11.12	11.49	11.67	13.39	19.41	46.25	27.74	1	6.43
151	12.16	12.74	11.98	11.73	15.45	52.47	25.72	1	6.51
152	8.94	8.33	8.57	8.74	12.2	25.21	21.39	1	5.3
153	11.51	12.28	11.35	13.21	8.22	22.18	23.84	1	4.25
154	11.22	11.21	13.17	13.95	10.62	26.2	23.31	1	5.47
155	11.33	9.75	12.02	13.17	22.51	35.97	25.75	1	5.06
156	10.48	10.84	12.61	12.72	12.34	41.01	27.17	1	6.51
157	10.46	9.38	11.68	11.5	20.67	51.01	21.03	1	5.07
158	9.41	7.91	11.74	11.53	14.96	36.77	15.69	1	5.3
159	9.68	8.97	10.57	10.94	18.99	32.58	27.28	1	4.74
160	8.54	9.01	10.64	12.04	13.03	47.27	26.25	1	5.85
161	11.51	12.48	11.72	13.71	12.89	49.3	9.32	1	6.3
162	10.45	10.55	11.43	13.19	15.53	35.91	13.45	1	4.52
163	9.25	9.99	11.4	12.56	19.74	33.28	32.03	1	5.68
164	11.36	11.55	13.52	13.8	18.64	39.53	15.12	1	5.25
165	8.57	9.25	8.67	8.29	15.28	40.15	14.54	1	6.05
166	8.76	7.33	10.78	11.3	17.12	49.77	31.34	1	4.97
167	10.84	10.41	12.86	13.8	18.98	60.66	28.55	1	5.54
168	8.94	8.83	10.54	12.5	14.27	34.03	25.22	1	4.23
169	11.36	10.55	11.57	11.47	11.56	21.79	30.76	1	5.68
170	9.73	9.25	9.61	9.14	12.73	45.43	25.68	1	4.41
171	11.13	10.6	12.83	13.68	9.31	51.12	14.71	1	6.4
172	12.25	12.13	14.16	15.38	17.82	55.62	25.1	1	5.54
173	11.3	11.02	11.11	12.77	16.64	42.91	11.79	1	4.98
174	10.31	9.42	12.75	13.3	17.61	51.15	23.86	1	4.68
175	12.1	11.52	14.27	15.49	16.12	38.07	27.74	1	5.3
176	10.06	8.83	10.69	10.57	20.25	44.88	10.18	1	4.96
177	11.93	12.29	14.19	13.94	14.33	25.58	11.14	1	5.89
178	9.49	10.41	9.73	10.34	9.91	50.36	24.92	1	4.87
179	11.93	10.89	11.79	12.85	21.56	50.8	10.53	1	5.85
180	12.14	11.49	12.55	14.52	10.93	28.99	14.87	1	5.09
181	9.66	8.64	9.25	8.87	20.65	33.3	26.99	1	5.82
182	10.95	11.54	11.86	13.46	18.54	56.74	11.68	1	4.56
183	9.48	10.21	11.94	11.57	12.68	28.86	19.04	1	5.64
184	9.07	7.31	10.52	10.55	10.17	34.48	9.2	1	5.94
185	11.85	11.05	13.17	14.87	21.56	48.27	16.51	1	6.49
186	11.18	9.72	11.18	12.61	16.01	50.38	9.85	1	5.07
187	9.58	7.97	10.15	11.16	17.24	38.45	28.32	1	5
188	9.78	8.89	11.55	12.05	21.33	31.44	17.19	1	5.24
189	11.37	11.85	12.99	14.56	9.22	24.39	19.84	1	7.35
190	8.74	7.87	10.05	10.29	18.24	57.7	22.9	1	5.19
191	9.12	7.75	10.26	11.85	10.41	37.63	28.16	1	4.45
192	9.92	8.21	10.28	11.18	20.99	37.11	14.72	1	5.42
193	9.27	9.24	9.26	9.78	12.89	54.68	26.82	1	4.78
194	10.05	9.39	11.91	11.99	10.38	52.71	8.18	1	5.18
195	9.37	9.8	9.92	11.84	18.79	52.53	18.95	1	5.77
196	9.82	9.53	10.85	11.12	10.53	44.72	26.47	1	5.42
197	9.4	9.8	11.04	12.92	15.9	45.64	23.14	1	6.98
198	8.54	6.81	10.73	11.13	17.56	60.31	23.17	1	4.82
199	9.3	8.65	9.05	8.76	13.23	34.78	20.71	1	6.04
200	12.37	13.1	12.53	13.33	14.24	45	13.18	1	4.36
201	10.63	8.77	12.55	14.38	20.64	45.71	10.27	1	4.33
202	11.81	10.33	12.89	12.66	19.48	56.29	30.28	1	4.93
203	10.54	8.59	10.82	12.51	17.41	46.76	13.05	1	5.6
204	11.34	10.82	12.54	13.89	14.32	40.5	24.95	1	4.92
205	12.48	10.78	13.17	14.42	14.54	44.16	15.96	1	5.78
206	10.37	9.1	12.01	11.92	11.54	52.12	26.32	1	5.58
207	10.91	9.92	13.36	15.14	15.25	51.7	21.14	1	5.23
208	10.85	9.66	11.77	11.5	17.75	44.84	28.54	1	5.63
209	10.57	11.2	12.24	12.58	14.7	40.94	9.2	1	6.82
210	10.13	8.53	11.25	12.02	10.21	47.02	28.87	1	5.42
211	9	7.45	11.23	12.71	15.06	52.48	22.87	1	5.67
212	12.08	11.13	12.11	13.36	21.4	45.64	30.07	1	6.17
213	11.19	10.03	12.74	13.23	11.07	45.59	31.11	1	6.02
214	11.36	11.99	12.28	13.45	20.66	33.16	9.55	1	4.27
215	11.12	10.79	11.32	11.89	13.95	49.15	9.35	1	6.49
216	9.42	10.15	11.13	12.56	13.12	38.4	25.66	1	4.64
217	9.45	8.93	9.55	10.59	13.96	44.79	25.28	1	5.7
218	11.69	9.73	12.48	14.08	16.32	38.16	16.99	1	4.93
219	11.07	11.53	13.04	12.72	9.9	26.51	16.95	1	4.94
220	9.19	7.43	10.75	12.22	8.06	34.63	22.87	1	5.17
221	9.73	9.57	9.7	9.32	13.56	31.41	20.42	1	6.18
222	11.36	9.77	10.89	12.27	16.75	32.92	27.38	1	5.91
223	9.84	8.51	12.12	11.82	11.53	28.52	19.58	1	5.53
224	12.08	11.41	14.44	14.31	10	48.04	12.3	1	5.77
225	10.9	11.81	11.73	12.26	16.04	39.8	24.12	1	6.75
226	10.41	11.04	10.56	11.63	11.26	52	23.21	1	5.55
227	8.65	9.42	11.72	8.56	28.87	59.7	9.57	0	-
228	8.53	9.03	8.18	10.58	32.04	45.37	6.06	0	-
229	10.49	11.39	11.05	8.99	19.21	31.04	19.27	0	-
230	11.37	10.14	8.44	9.07	28.8	64.85	8.67	0	-
231	9.21	8.48	11.56	8.99	27.85	15.15	4.51	0	-
232	8.78	11.44	10.18	10.37	26.62	47.18	13.34	0	-
233	8.75	8.35	8.22	9.04	26.72	29.59	25.77	0	-
234	10.46	10.8	9.05	9.68	21.26	24.01	18.17	0	-
235	10.9	10.46	10.43	8.25	21.33	18.32	20.48	0	-
236	10.31	11.61	10.55	8.71	12.52	35.36	6.04	0	-
237	9.38	9.96	8.67	8.26	17.2	41.12	8.32	0	-
238	10.22	8.53	11	11.61	31.97	21.81	13.85	0	-
239	10.94	10.9	8.4	10.56	26.94	36.38	15.1	0	-
240	10.46	10.58	10.54	8.62	24.33	23.96	23.84	0	-
241	8.03	8.99	8.49	10.19	31.58	29.39	15.53	0	-
242	8.38	11.57	8.96	8.14	24.96	42.56	19.45	0	-
243	10.95	9.01	8.95	11.02	28.69	71.03	4.83	0	-
244	8.77	9.86	9.3	9.99	15.15	13.89	9.43	0	-
245	8.42	10.14	8.29	10.99	13.95	59.03	8.44	0	-
246	9.67	8.51	10.68	11.71	32.45	35.78	12.45	0	-
247	8.48	9.81	9.38	8.61	21.21	34.26	15.61	0	-
248	9.32	9.08	8.14	8.16	19.01	32.18	6.61	0	-
249	11.51	10.47	11.12	9.47	25.68	19.13	17.16	0	-
250	8.42	10.17	8.33	11.55	19.93	43.98	14.31	0	-
251	8.57	11.88	8.27	11.88	24.33	42.02	6.25	0	-
252	10.69	10.99	11.89	10.47	31.35	37.23	6.06	0	-
253	9.9	8.98	10.97	11.8	30.89	18.74	24.93	0	-
254	9.18	8.01	11.21	8.65	28.01	33.22	11.56	0	-
255	8.14	10.76	9.44	8.98	24.16	37.82	13.67	0	-
256	11.5	11.74	8.65	11.98	30.51	45.87	9.77	0	-
257	9.64	11.61	8.2	10.8	32.97	39.02	12.17	0	-
258	10.4	11.89	9.58	11.13	10.82	23.44	3.26	0	-
259	10.67	11.93	9.36	8.27	28.57	35.26	23.42	0	-
260	8.99	9.58	9.51	8.98	17.62	56.01	8.21	0	-
261	10.48	9.11	8.8	11.22	24.31	36.08	7.55	0	-
262	9.19	10.26	8.26	8.24	19.03	35.74	22.09	0	-
263	9.53	10.3	8.85	11.6	23.36	43.75	20.5	0	-
264	8.46	10.06	11.38	11.4	15.57	17.37	16.74	0	-
265	8.2	10.13	11.29	8.79	11.34	20.64	7.43	0	-
266	9.85	11.96	11.66	11.84	23.71	31.61	16.71	0	-
267	10.16	9.46	9.23	8.16	21.96	26.48	7.49	0	-
268	9.19	11.91	11.02	9.34	28.96	35.97	2.57	0	-
269	11.81	11.66	11.6	8.86	29.92	64.57	3.02	0	-
270	11.78	11.51	11.15	10.32	24.33	19.99	13.08	0	-
271	9.24	11.22	9.39	8.21	30.47	50.9	10.04	0	-
272	8.26	10.8	9.38	8.6	15.04	36.96	22.73	0	-
273	8.71	11.91	10.69	11.44	20.95	36.79	27.61	0	-
274	8.26	10.07	10.35	10.23	21.56	28.09	23.37	0	-
275	10.69	9.98	11.48	9.14	29.14	26.75	19.92	0	-
276	9.74	10.71	10.63	10.44	19.1	12.94	17.9	0	-
277	8.14	11.44	9.12	10.21	20.05	39.18	4.66	0	-
278	8.83	9.46	11.87	11.79	17.03	64.55	5.98	0	-
279	11.32	11.7	10.53	9.34	21.99	18.11	23.36	0	-
280	8.77	9.9	8.33	10.88	17.37	19	22.15	0	-
281	8.48	8.56	9.4	8.77	27.17	37.09	4.64	0	-
282	11.54	10.02	8.07	9.54	31.52	35.63	17.9	0	-
283	10.2	11.11	9.04	9.31	13.7	25.4	6.4	0	-
284	8.33	11.81	9.82	8.54	16.07	19.32	22.4	0	-
285	8.24	9.31	8.63	8.32	25.74	33.99	24.08	0	-
286	8.9	11.51	8.47	8.7	30.12	38.14	17.05	0	-
287	9.18	10.79	9.06	9.13	26.67	41.03	6.5	0	-
288	8.25	10.05	11.4	11.09	13.35	55.96	8	0	-
289	8.59	8.69	8.09	9.67	23.21	32.9	9.74	0	-
290	8.4	10.38	10.97	9.53	23.61	13.4	19.89	0	-
291	10.23	11.7	9.54	8.74	31.4	27.81	12.1	0	-
292	10.63	10.76	10.73	11.72	20.83	11.2	23.16	0	-
293	11.24	10.53	10.59	10.69	32.85	28.55	18.64	0	-
294	10.24	10.95	8.68	10.4	22.64	35.26	13.27	0	-
295	11.48	9.57	9.53	10.1	27.78	29.97	12.94	0	-
296	11.99	11.34	8.45	11.12	20.73	20.84	18.41	0	-
297	8.31	12	11.45	10.64	20.08	67.96	4.84	0	-
298	11.61	10.98	10.98	9.48	23.01	15.88	15.69	0	-
299	12.66	11.28	10.6	9.46	18.99	16.57	13.68	0	-
300	8.45	9.58	8.65	9.89	26.45	36.32	14.69	0	-
301	11.13	10.13	9.61	11.65	26.61	24.78	19.84	0	-
302	9.16	9.78	9.84	9.7	13.17	44.97	5.1	0	-
303	8.23	11.58	8.96	9.28	10.3	14.32	14.47	0	-
304	8.7	9.5	11.69	9.5	22.67	12.31	18.04	0	-
305	10.03	10.97	10.25	11	31.6	27.57	23.93	0	-
306	8.67	10.21	9.45	9.47	15.08	49.18	7.36	0	-
307	8.93	11.21	10.38	8.01	11.37	69.05	3.86	0	-
308	11.3	11.78	9.32	8.64	23.04	70.74	4.33	0	-
309	11.1	10.64	8.43	8.87	30.25	54.34	5.86	0	-
310	11.26	11.93	11.61	9.81	20.97	31.88	12.07	0	-
311	10.48	10.47	9.9	8.66	28.65	34.34	21.99	0	-
312	9.72	9.87	8.35	10.63	20.65	68.18	4.28	0	-
313	10.03	9.21	9.79	10.32	20.86	18.93	17.17	0	-
314	11.42	8.97	8.59	11.93	23.64	20.76	22.07	0	-
315	9.27	11.99	9.43	10.92	24.78	36.68	24.45	0	-
316	8.94	11.04	9.36	8.7	23.22	32.21	19.14	0	-
317	11.2	9.33	8.66	10.18	20.19	17.61	26.37	0	-
318	9.8	9.65	11.37	11.48	27.55	53.1	8.72	0	-
319	9.86	11.11	10.45	10.11	29.6	52.61	7.3	0	-
320	10.21	9.56	8.27	9.23	15.5	23.3	14.71	0	-
321	8.75	11.61	8.49	10.65	30.07	45.69	9.66	0	-
322	11.37	11.53	10.32	10.87	15.97	24.14	10.17	0	-
323	9.4	9.05	11.58	9.3	27.9	15.79	23.87	0	-
324	9.49	9.1	11.92	9.58	30.01	16.14	19.04	0	-
325	9.15	10.57	10.15	10.92	18.11	30.46	4.02	0	-
326	10.11	8.51	9.01	8.91	28.7	32.69	4.07	0	-
327	11.1	10.1	10.06	9.1	30.81	27.96	25.42	0	-
328	12.53	10.3	10.02	10.88	25.01	21.52	24.19	0	-
329	9.16	10.61	8.86	10.48	20.88	35.66	21.59	0	-
330	8.21	8.72	9.81	8.7	22.06	28.74	9.07	0	-
331	10.23	10.47	10.81	10.54	31.56	63.07	12.64	0	-
332	9.09	10.25	8.25	11.52	12.97	21.44	16.36	0	-
333	8.68	11.21	9.07	10.95	28.49	55.02	27.82	0	-
334	11.85	11.46	9.79	9.85	23.22	47.81	7.87	0	-
335	8.15	10.51	9.88	9.06	25.45	29.15	23.12	0	-
336	11.02	10.4	11.56	11.88	25.46	21.3	7.91	0	-
337	8.16	8.04	10.79	8.71	13.28	18.69	8.92	0	-
338	8.13	8.68	11.33	10.63	26.39	39.97	14.8	0	-
339	10.28	9.3	8.37	11.59	30.78	47.87	15.23	0	-
340	10.49	10.81	11.34	11.03	13.39	14.22	6.03	0	-
341	8.62	9.66	9.99	10.82	13.65	44.29	3	0	-
342	11.56	11.03	8.16	10.37	29.14	55.53	12.42	0	-
343	8.79	9.15	10.13	10.35	22.98	38.86	3.26	0	-
344	8.55	9.84	11.54	8.51	12.02	38.82	12.94	0	-
345	8.4	11	10.96	10.52	18.55	39.05	11.77	0	-
346	11.34	10.31	11.46	9.61	32.48	27.7	18.95	0	-
347	10.48	9.34	10.87	8.3	26.41	33.54	24.72	0	-
348	10.64	9.04	9.32	9.25	20.31	39.48	10.72	0	-
349	11.61	9.74	11.89	9.77	19.18	32.07	11.07	0	-
350	10.77	9.15	9.47	8.72	15.42	34.14	8.58	0	-
351	9.38	8.35	11.4	11.5	13.39	25.94	5.45	0	-
352	11.15	10.1	10.65	10.11	17.37	28.95	10.08	0	-
353	9.38	9.09	9.43	10.21	15.08	18.38	16.43	0	-
354	10.78	9.58	11.49	11.66	20.71	16.66	21.57	0	-
355	11.84	10.87	11.51	8.3	17.21	47.38	3.13	0	-
356	11.57	9.44	11.79	10.01	19.28	35.21	5.6	0	-
357	11.67	10.54	13.93	9.84	24.1	68.57	7.31	0	-
358	10.17	9.19	11.9	10.31	16.39	48.79	8.27	0	-
359	11.11	9.77	9.16	9.94	23.49	36.64	26.07	0	-
360	11.92	9.76	10.96	8.84	26.44	38.45	19.35	0	-
361	10.79	9.05	11.07	8.78	27.15	37.15	22.78	0	-
362	10.74	9.85	9.01	9.28	16.19	27.13	14.6	0	-
363	9.6	9.05	9.6	9.34	16.76	22.48	16.94	0	-
364	9.76	10.27	9.88	11.35	16.5	22.23	19.84	0	-
365	10.76	9.49	10.49	9.91	23.2	38.1	14.26	0	-
366	10.81	10.66	11	9.3	29.65	48.43	24.16	0	-
367	9.61	9.58	10.57	11.23	14.73	19.48	12.08	0	-
368	10.73	10.06	13.16	14.08	18.16	30.95	16.65	0	-
369	11.83	13.69	11.38	11.76	21.29	21.03	10.9	0	-
370	12.46	11.61	14.13	14.78	27.84	19.55	8.73	0	-
371	10.62	10.29	11.33	12.22	22.98	29.64	9.73	0	-
372	9.7	9.47	9.39	9.75	16.17	30.02	15.86	0	-
373	10.89	12.59	12.04	11.61	15.26	33.29	16.85	0	-
374	9.43	11.27	10.02	11.96	14.57	33.33	13.16	0	-
375	13.5	13.67	15.62	16.75	18.91	29.17	10.06	0	-
376	9.9	10.73	10.96	12.49	29.92	28.59	7.63	0	-
377	8.66	8.39	8.44	8.35	13.54	15.27	16.27	0	-
378	9.17	8.97	9.03	10.85	30.91	15.86	12.27	0	-
379	11.23	11.44	13.47	13.83	32.57	36.48	10.17	0	-
380	13.37	12.51	14.7	14.2	26.17	36.5	13.58	0	-
381	8.87	9.65	10.57	10.9	25.52	29.63	13.09	0	-
382	12.03	13.05	12.24	13.56	25.82	35.78	16.08	0	-
383	11.93	11.16	12.86	14.24	20.24	26.85	11.86	0	-
384	10.15	11.27	10.39	10.5	17.99	23.15	14.02	0	-
385	9.69	10.22	11.92	12.7	14.39	25.62	16.64	0	-
386	11.41	11.92	12.72	12.6	20.88	22.94	9.26	0	-
387	11.92	11.77	11.43	12.7	21.44	15.63	17.26	0	-
388	10.76	10.77	12.48	14.2	30.35	33.51	12.99	0	-
389	12.83	13.34	12.92	13.41	22.5	35.44	6.16	0	-
390	10.56	9.7	10.82	10.7	20.1	30.39	10.25	0	-
391	13.12	12.7	14.79	14.61	19.63	28.33	10.72	0	-
392	13.18	13.82	14.05	14.58	26.63	28.21	11.9	0	-
393	11.32	11.43	11.04	11.37	21.26	21.65	17.62	0	-
394	10.08	10.76	9.81	10.86	13.59	23.38	18.07	0	-
395	9.53	9.8	10.81	11.54	28.75	14.19	14.45	0	-
396	12.26	11.8	12.75	14.47	25.95	20.81	12.18	0	-
397	10.34	10.05	10.78	10.54	18.23	20.71	14.06	0	-
398	9.42	9.67	11.2	11.92	18.67	24.95	6.52	0	-
399	11.57	12.26	13.51	14.8	14.89	16.7	19.67	0	-
400	12.55	13.81	13.07	13.58	17.16	32.56	18.73	0	-
401	10.15	11.12	11.8	12.43	12.04	35.74	11.14	0	-
402	10.5	9.59	12.75	13.47	31.51	19.93	11.35	0	-
403	10.79	12.1	11.34	13.09	13.61	28.85	16.72	0	-
404	11.02	11.7	13.01	13.92	20.27	24.15	12.79	0	-
405	10.68	11.69	11.96	11.93	11.37	14.54	11.02	0	-
406	13.23	13.22	13.49	14.53	13.43	25.96	10.85	0	-
407	10.19	9.38	10.85	10.77	22.36	32.07	19.06	0	-
408	9.21	10.57	9.65	10.79	29.56	34.47	14.98	0	-
409	9.83	9.56	10.07	11.55	15.03	18.12	8.96	0	-
410	9.77	10.12	9.61	10.03	30.77	22.64	8.85	0	-
411	9.49	9.62	8.99	9.58	14.5	33.86	6.11	0	-
412	11.64	12.18	13.27	14.19	22.5	27.34	8.24	0	-
413	9.99	9.34	11.4	11.17	13.1	17.05	19.25	0	-
414	9.13	10.06	8.69	10.66	30.03	21.53	17.21	0	-
415	10.52	10.36	11.28	12.37	27.98	26.16	11.84	0	-
416	13.28	13.42	13.34	13.49	21.55	20.13	9.18	0	-
417	10.49	10.08	12.34	12.31	11.12	27.27	13.17	0	-
418	13.47	14.32	13.9	14.35	24.28	34.79	11.84	0	-
419	9.85	9.36	11.33	12.05	23.97	20.88	9.54	0	-
420	10.54	9.85	12.08	12.92	16.65	21.84	11.35	0	-
421	10.51	11.89	11.01	11.19	12.1	27.36	11.62	0	-
422	11.59	10.82	12.51	12.07	17.2	36.75	12.98	0	-
423	11.82	10.95	11.93	11.6	26.64	34.49	14.41	0	-
424	12.65	13.94	13.62	13.31	24.01	37.7	8.26	0	-
425	10.52	11.4	10.65	10.62	15.08	29.66	12.28	0	-
426	10.74	11.22	13.05	13.19	30.54	34.17	14.76	0	-
427	10.42	9.6	11.93	13.85	23.57	24.57	16.5	0	-
428	12.38	13.19	14.46	14.32	23.95	30.17	16.48	0	-
429	9.43	11.41	10.31	12.26	18.54	23.61	9.72	0	-
430	9.86	9.69	11.18	11.14	15.21	35.87	16.62	0	-
431	10.95	11.96	11.59	12.11	17.67	18.55	10.01	0	-
432	9.86	9.68	10.68	11.91	16.25	36.86	12.88	0	-
433	9.64	9.53	11.92	13.34	15.89	15.44	17.74	0	-
434	9.96	9.26	10.85	10.58	25.74	34.17	18.07	0	-
435	11.79	13.42	11.32	12.43	23.31	34.11	12.34	0	-
436	11.42	12.22	11.5	12.8	28.77	24.37	5.43	0	-
437	12.12	13.9	11.9	13.07	29.66	35.1	10.74	0	-
438	12.49	12.89	14.74	14.25	13.27	22.24	9.41	0	-
439	12.63	14.08	12.79	13.89	21.48	28.47	15.19	0	-
440	10.05	11.11	10.2	10.88	24.01	35.18	14.28	0	-
441	11.55	11.05	13.55	14.08	27.84	25.53	15.38	0	-
442	10.57	10.4	12.56	12.18	29.25	29.88	15.42	0	-
443	10.99	10.11	10.99	12.93	23.39	23.18	13.3	0	-
444	11.68	13.14	11.3	12.77	15.57	28.69	9.2	0	-
445	12.36	13.3	12.95	13.78	24.47	24.61	17.52	0	-
446	9.34	11.07	9.84	9.83	10.53	30.48	11.74	0	-
447	10.41	12.41	12.18	12.98	31.51	30	8.52	0	-
448	12.71	12.18	13.4	13.32	28.49	32.34	14.35	0	-
449	10.35	9.46	9.87	11.6	17.78	22.68	9.87	0	-
450	8.57	9.04	8.93	10.57	28.12	28.79	8.74	0	-
451	13.36	12.55	14.61	16.52	18.27	24.96	11.16	0	-
452	12.45	11.79	14.88	16.85	19.86	21.29	8.31	0	-
453	9.69	11.14	9.67	9.9	11.1	16.12	8.2	0	-
454	10.59	12.44	10.66	12.16	13.77	34.38	7.52	0	-
455	12.73	13.06	13.58	15.55	32.98	22.7	13.82	0	-
456	13.39	13.8	13.17	15.11	16.79	20.38	16.22	0	-
457	12.07	12.11	13.31	14.07	30.2	25.03	7.38	0	-
458	12.02	12.67	14.08	14.97	18.61	35.64	16.13	0	-
459	13.44	13.91	15.89	15.86	14.53	22.91	10.24	0	-
460	12.57	12.67	12.5	12.56	11.72	25.1	6.37	0	-
461	11.15	11.94	11.68	13.36	14.1	36.16	7.15	0	-
462	12.09	11.77	13.21	14.52	30.42	35.66	14.17	0	-
463	11.64	10.86	13.85	14.16	27.5	14.2	15.47	0	-
464	9.86	11.47	9.7	10.31	29.83	34.55	7.51	0	-
465	10.56	9.86	10.3	11.43	15.92	26.62	14.72	0	-
466	12.09	13.27	12.23	13.63	15.19	16.78	7.68	0	-
467	8.57	9.25	10.05	11.02	17.69	29.81	8.99	0	-
468	11.81	11.62	11.66	13.65	16.91	33.91	11.64	0	-
469	9.55	11.01	9.46	9.24	25.33	18.93	11.08	0	-
470	10.95	11.62	13.18	12.79	30.86	34	8.46	0	-
471	13.32	12.49	13.73	13.24	15.41	34.76	12.18	0	-
472	11.33	11.28	11.28	10.81	12.27	20.85	16.95	0	-
473	11.15	11.82	13.51	14.7	25.34	23.86	15.82	0	-
474	9.73	10.72	11.73	12.38	29.18	27.99	12.64	0	-
475	10.66	12.32	10.9	11	19.51	22.96	15.46	0	-
476	12.64	11.87	15.01	15.4	27.36	28.85	11.34	0	-
477	8.61	9.52	10.75	10.7	25.93	28.06	16.57	0	-
478	11.68	12.02	11.87	11.58	10.83	18.64	8.65	0	-
479	9.9	10.28	11.33	11.62	28.44	34.99	8.74	0	-
480	13.02	13.51	15.4	16.33	15.23	36.41	6.62	0	-
481	12.73	13.83	14.15	14.79	22.44	29.13	17.26	0	-
482	13.31	13.01	15.39	16.62	17.06	17.65	15.03	0	-
483	10.88	11.11	11.84	12.65	27.75	26.98	9.35	0	-
484	8.69	10.64	9.25	10.8	19.58	26.62	13.65	0	-
485	9.29	9.56	9.53	9.64	24.6	20.89	10.6	0	-
486	8.63	10	8.24	8.48	18.48	17.95	9.45	0	-
487	11.84	13.01	13.01	14.9	26.79	25.46	15.15	0	-
488	11.99	11.55	13.51	14.41	22.4	29.89	16.45	0	-
489	11.5	13.32	13.04	13.38	29.41	33.14	16.85	0	-
490	12.26	13.16	12.18	13.58	20.08	36.48	11.76	0	-
491	11.88	11.33	11.57	11.2	28.61	21.86	10.44	0	-
492	12.78	13.86	12.91	13.34	12.96	20.44	7.27	0	-
493	12.55	12.88	14.59	14.63	16.28	35.78	8.61	0	-
494	10.52	10.85	11.34	11.82	20.58	28.21	16.53	0	-
495	9.13	8.43	9.84	11.35	26.24	18.27	16.33	0	-
496	12.8	12.02	13.76	15.18	16.26	36.29	13.87	0	-
497	13.32	13.73	12.94	12.56	23.71	25.2	17.04	0	-
498	13.18	12.3	12.78	12.9	19.38	22.09	6.5	0	-
499	12.8	14.47	15.07	15.14	25.11	15.37	6.47	0	-
500	8.58	9.66	8.7	9.22	14.32	25.5	9.15	0	-
501	12.09	12.08	12.52	14.05	28.77	16.57	7.24	0	-
502	10.96	11.95	11.05	10.72	21.02	27.78	15.48	0	-
503	9.44	10.2	9.26	11.04	27.87	26.3	15.2	0	-
504	12.99	14.53	12.97	12.59	11.31	29.31	9.62	0	-
505	10.95	12.43	12.85	12.86	17.11	16.99	16.95	0	-
506	9.3	10.89	11.12	13	24.3	22.72	8.79	0	-
507	10.67	11.03	12.52	13.15	10.16	26.61	17.19	0	-
508	12.32	13.14	13.46	13.75	25.28	18.61	8.69	0	-
509	12.52	13.22	14.6	16.21	14.82	25.89	14.4	0	-
510	13.25	13.06	13.47	14.44	29.75	27.73	14.81	0	-
